# Supplementary material
Source: ML conference proceedings conference paper supplement (https://openaccess.thecvf.com/content/WACV2021/html/Lee_DynaVSR_Dynamic_Adaptive_WACV_2021_paper.html)

# DynaVSR: Dynamic Adaptive Blind Video Super-Resolution “Qualitative Results”

Suyoung Lee\*, Myungsub Choi\*, Kyoung Mu Lee

ASRI, Department of ECE, Seoul National University  
{esw0116, cms6539, kyoungmu}@snu.ac.kr

<https://github.com/esw0116/DynaVSR.git>

# Meta-learning Results: Synthetic Downscaling Kernels

# Test Results for REDS-val(Sequence 000)

Input Image

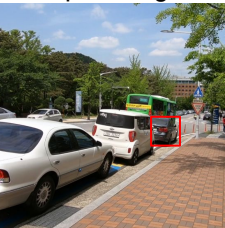

KG+ZSSR

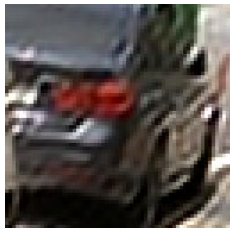

TOF Baseline

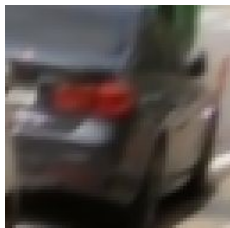

DUF Baseline

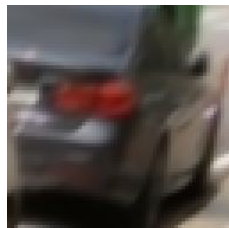

EDVR Baseline

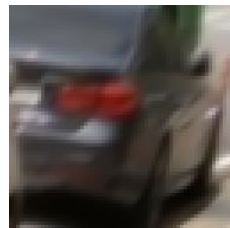

IKC

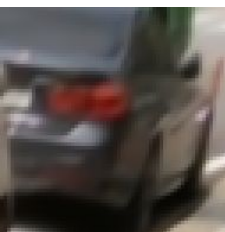

CF+CARN

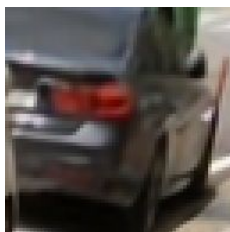

TOF+DynaVSR

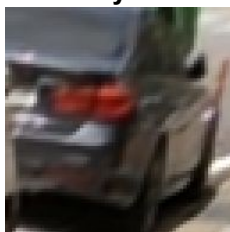

DUF+DynaVSR

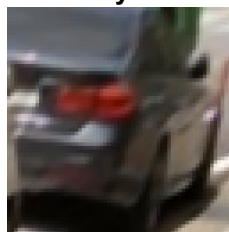

EDVR+DynaVSR

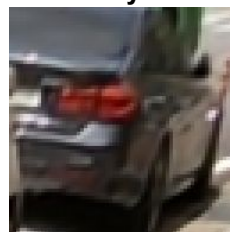

GT

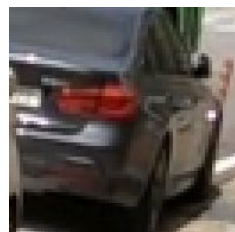

Input Image

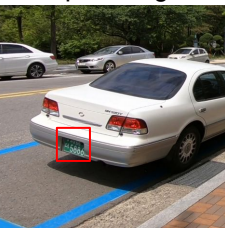

KG+ZSSR

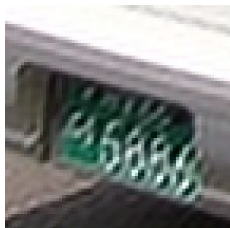

TOF Baseline

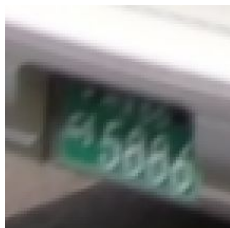

DUF Baseline

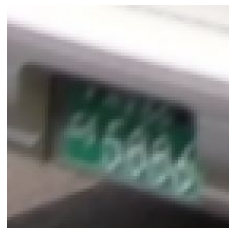

EDVR Baseline

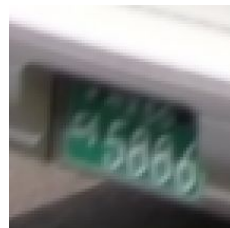

IKC

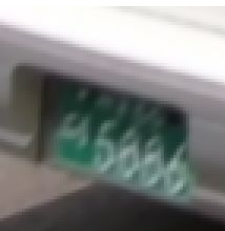

CF+CARN

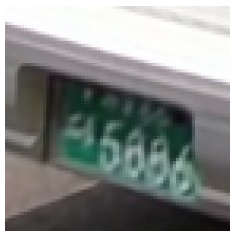

TOF+DynaVSR

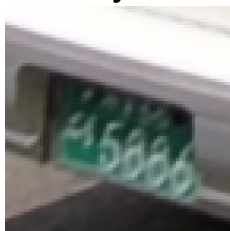

DUF+DynaVSR

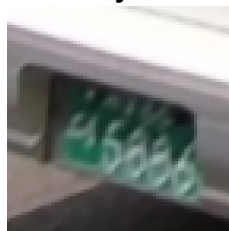

EDVR+DynaVSR

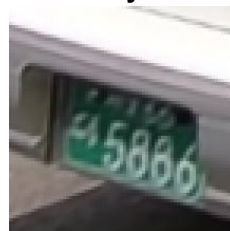

GT

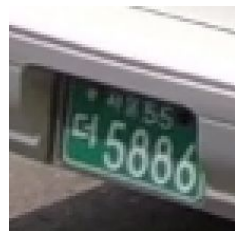

Test Results for REDS-val(Sequence 011)

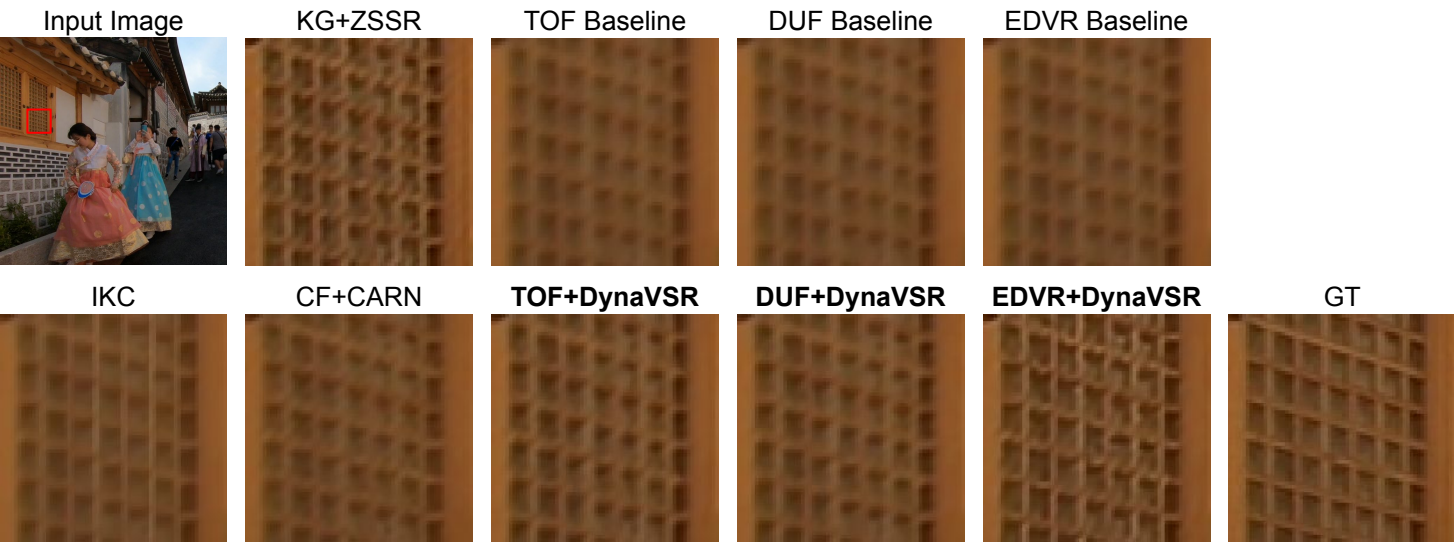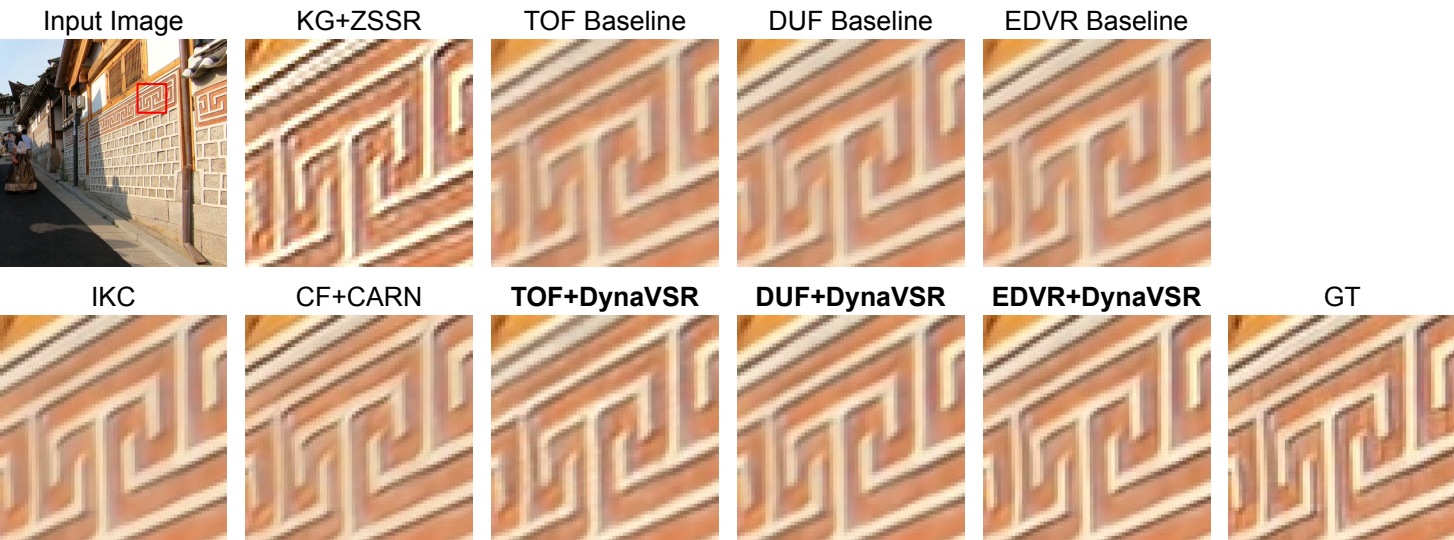

Test Results for REDS-val(Sequence 020)

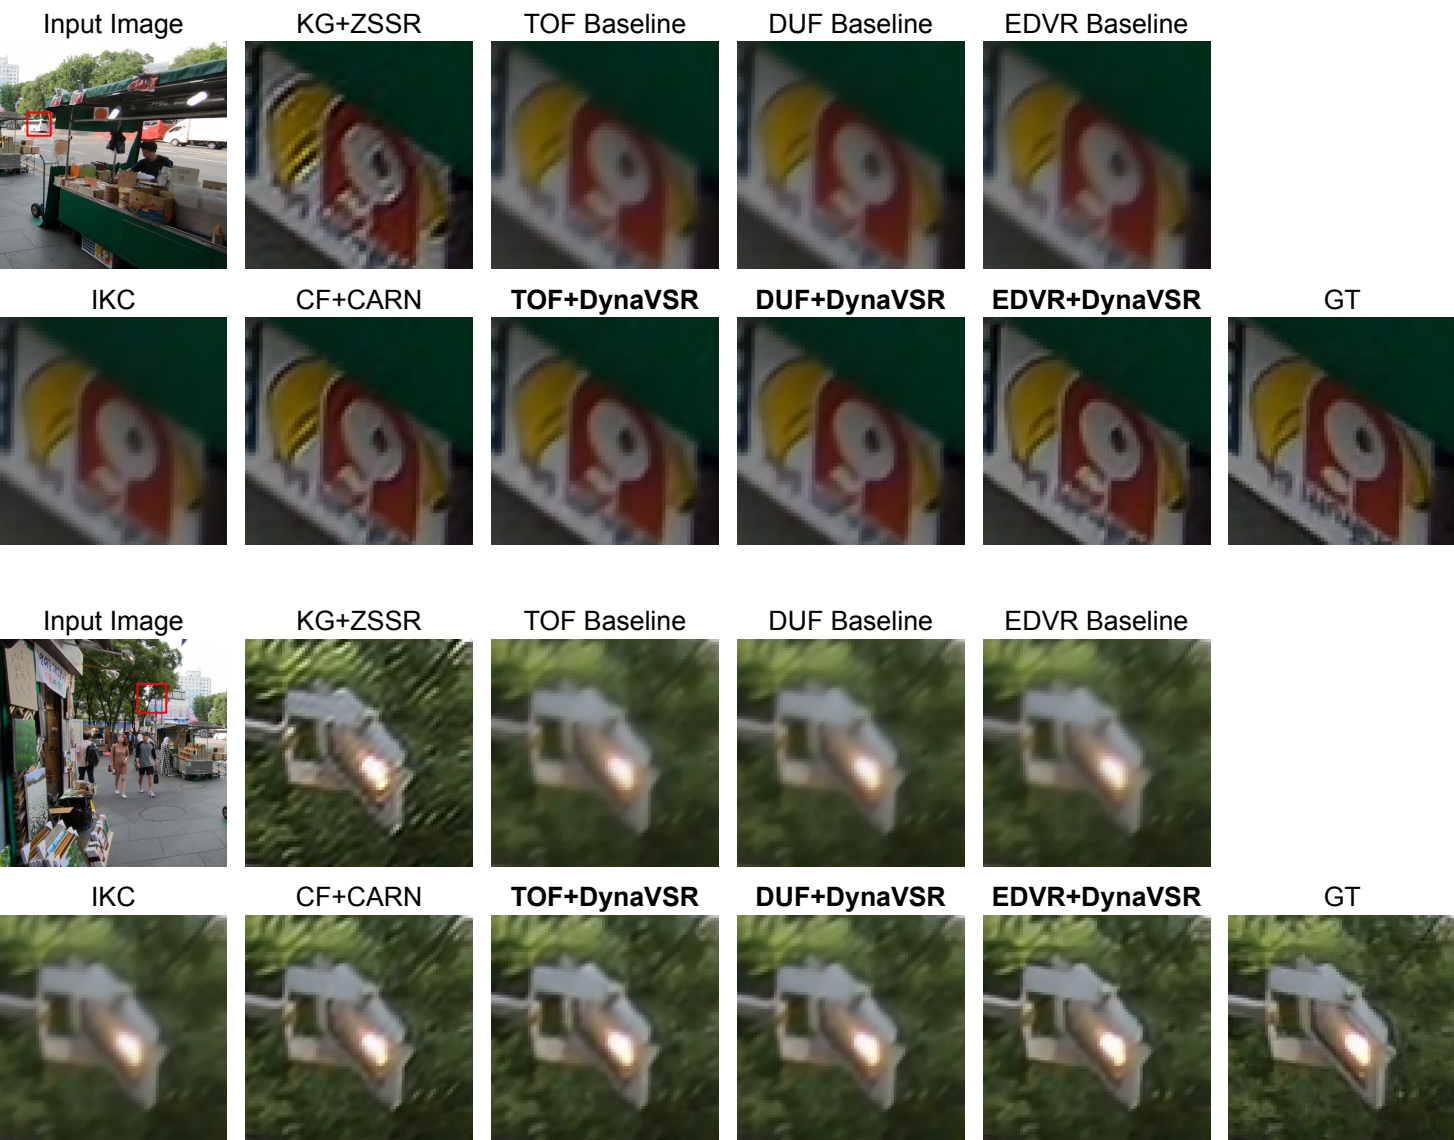



Test Results for Vid4(Sequence ‘calendar’)

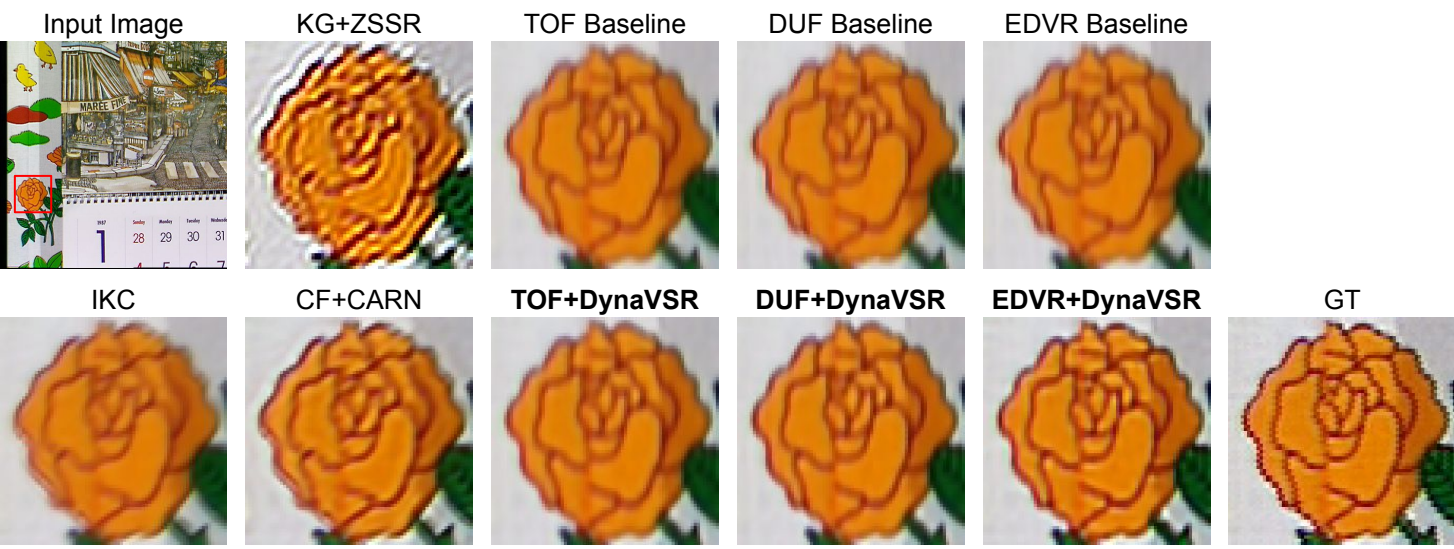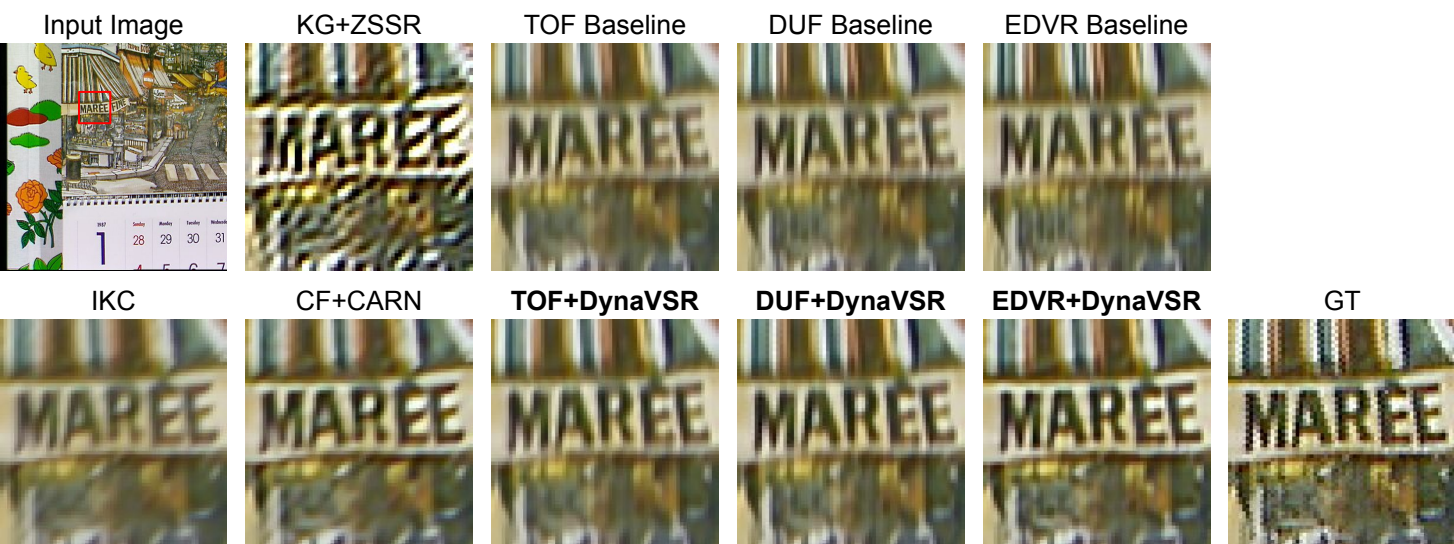

Test Results for Vid4(Sequence 'walk')

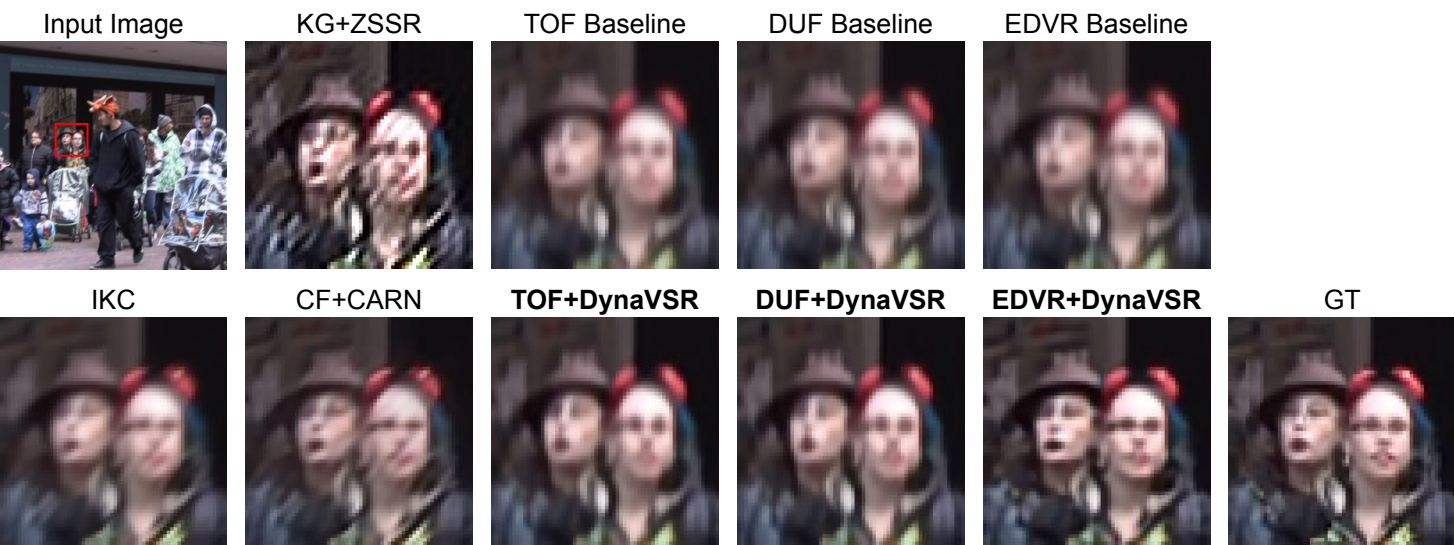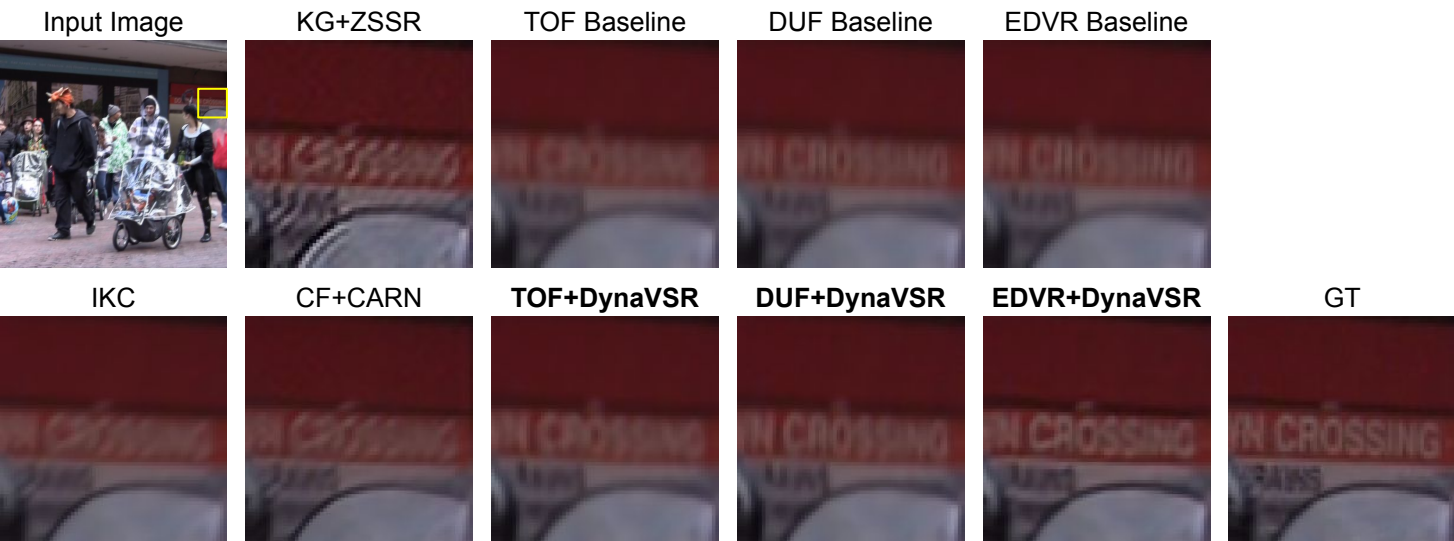

# Meta-learning Results: Real Video (No GT)



**Input**

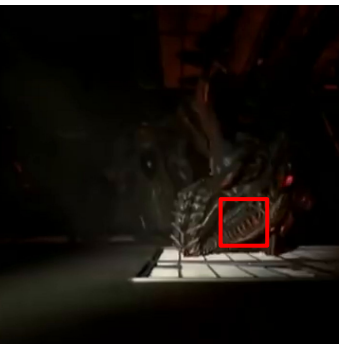

**EDVR Baseline**

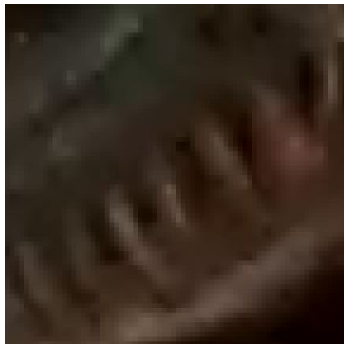

**KG+ZSSR**

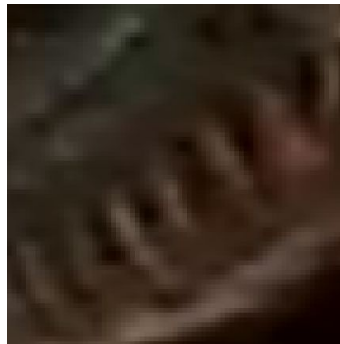

**CF+CARN**

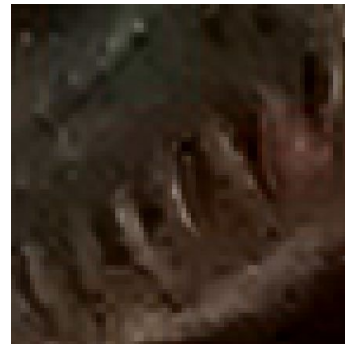

**IKC**

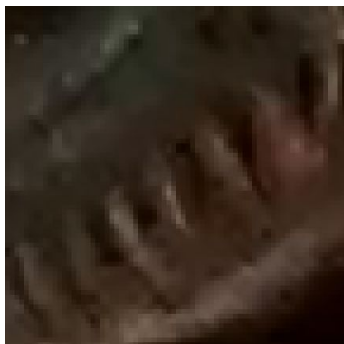

**EDVR+DynaVSR**

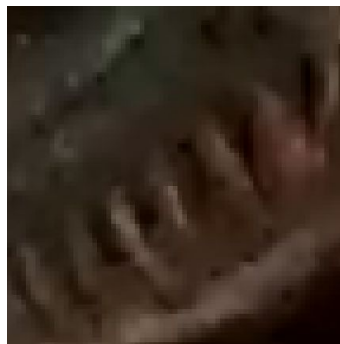

**Input**

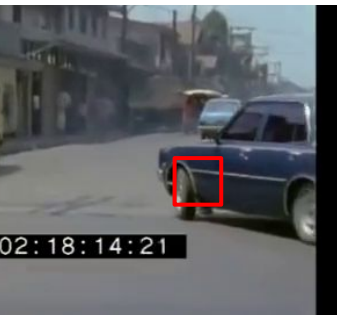

**EDVR Baseline**

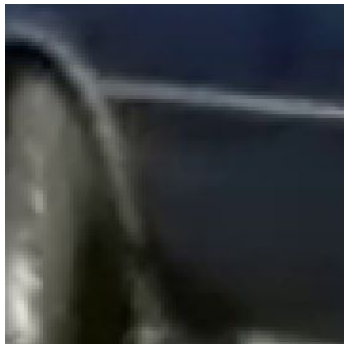

**KG+ZSSR**

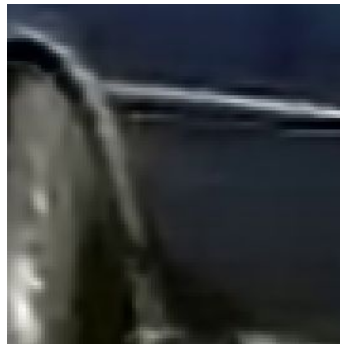

**CF+CARN**

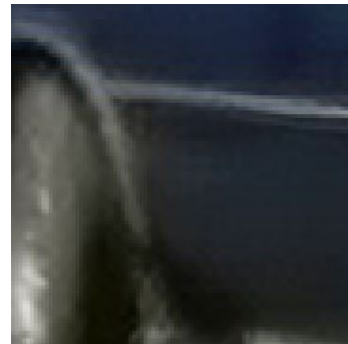

**IKC**

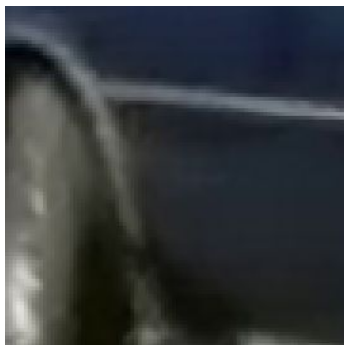

**EDVR+DynaVSR**

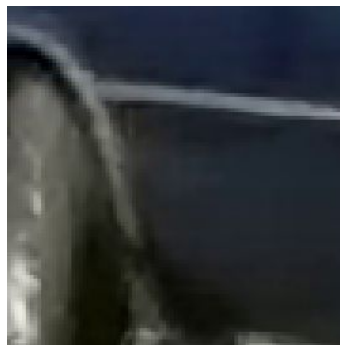

Supplement: Supplementary file 1 [file Lee_DynaVSR_Dynamic_Adaptive_WACV_2021_supplemental.zip]
